# Supplementary material for: Repetitive Bacterial Disinfection of Respirators by Polydopamine Coating
Source: MDPI journal article supplement (doi:10.3390/app12178710), 2022-08-30
Supplement: s1 [file s1]

# Repetitive Bacterial Disinfection of Respirators by Polydopamine Coating

|           | Composition (at. %) |         |
|-----------|---------------------|---------|
|           | Bare PP             | PP-PDA1 |
| C-C / C=C | 98.7                | 38.1    |
| C-O / C-N | 1.3                 | 30.1    |
| C=O       | -                   | 16      |
| -COOH     | -                   | 15.9    |

**Table S1.** Atomic percentages of each functional group in bare polypropylene and polydopamine-coated polypropylene.

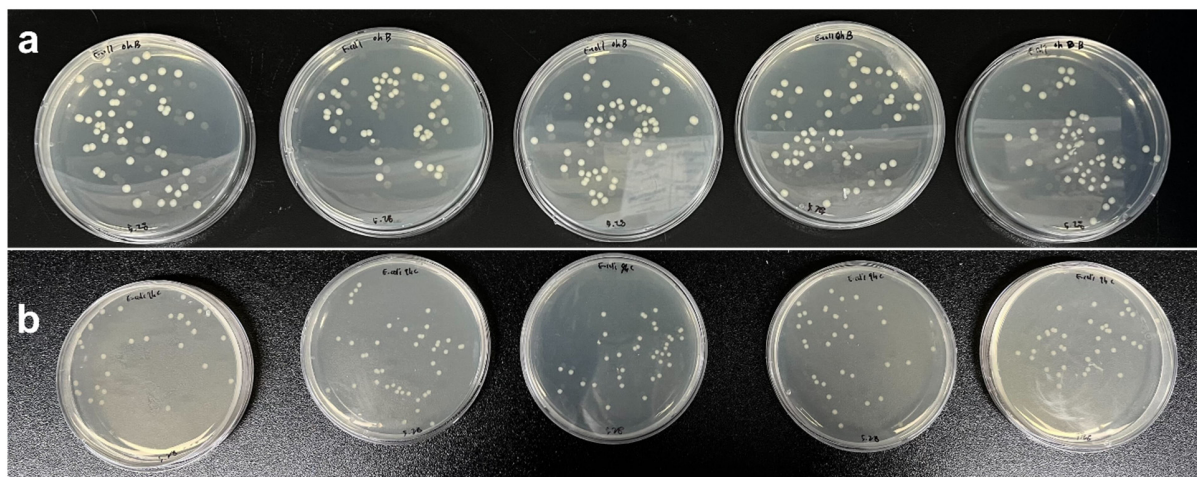

**Figure S1.** Representative images of plates used for counting *E.coli* colonies: a) control (bare polypropylene) and b) polydopamine-coated polypropylene after 9 h of incubation.

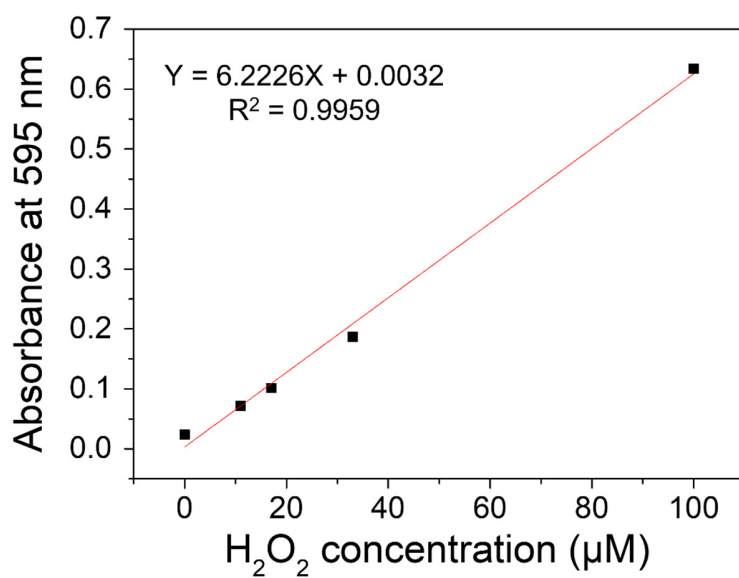

**Figure S2.** Standard curve used to quantify the amount of H<sub>2</sub>O<sub>2</sub> produced from polydopamine-coated polypropylene.

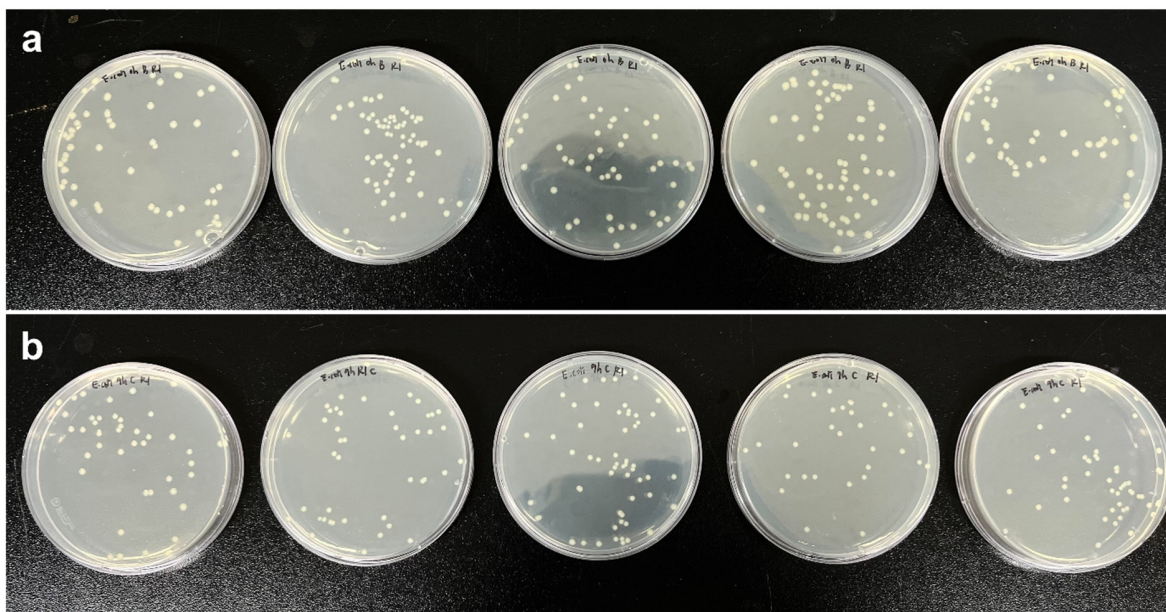

**Figure S3.** Representative images of plates used for counting *E.coli* colonies: a) control (bare polypropylene) and b) polydopamine-coated polypropylene (number of coating cycles = 2, PP-PDA2).

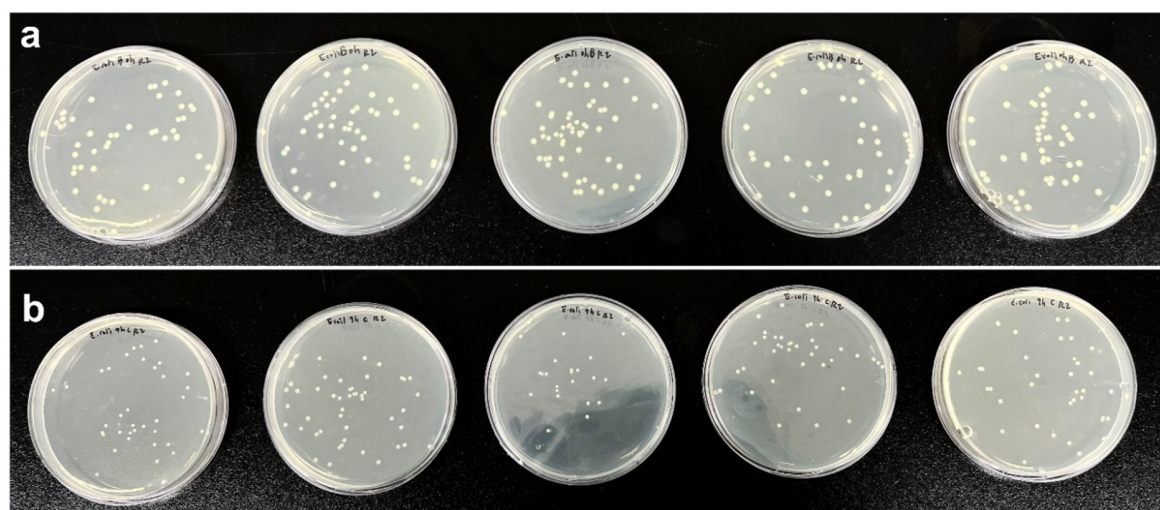

**Figure S4.** Representative images of plates used for counting of *E.coli* colonies: a) control (bare polypropylene) and b) polydopamine-coated polypropylene (number of coating cycles = 3, PP-PDA3).
