# Supplementary material for: Repetitive Bacterial Disinfection of Respirators by Polydopamine Coating
Source: MDPI journal article supplement (doi:10.3390/app12178710), 2022-08-30
Supplement: s1 [file s1]

Archive with 1 entries (1 files):
- applsci-1871481-supplementary.pdf
